# Supplementary material
Source: PubMed Central journal article supplement (PMC9339523)
Supplement: NIHMS1818854-supplement-3.pdf [file NIHMS1818854-supplement-3.pdf]

**Figure S1**

**A**

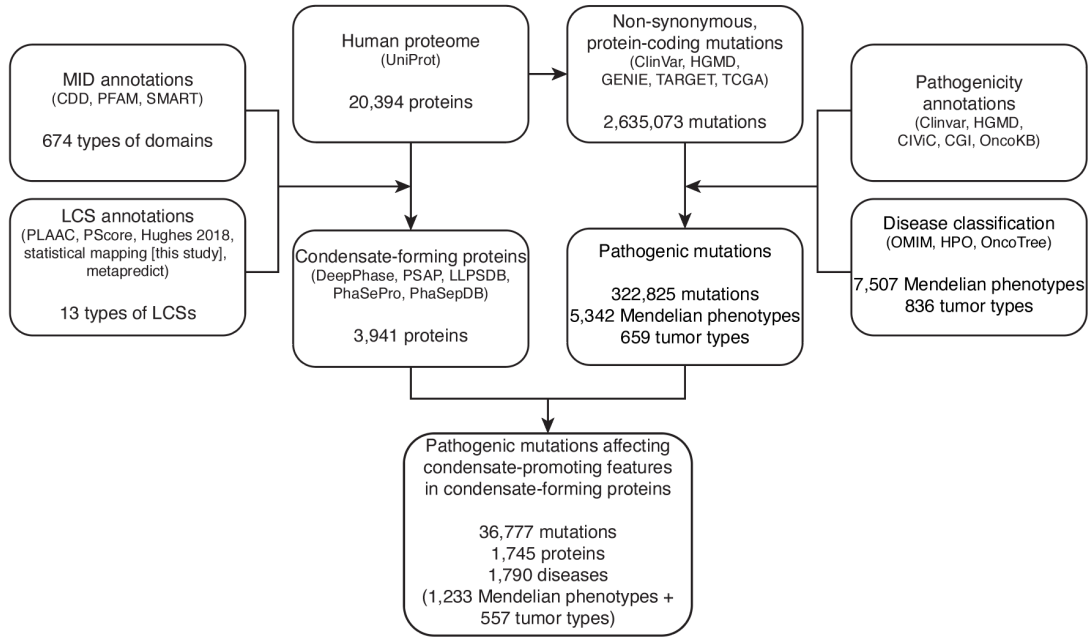

**B**

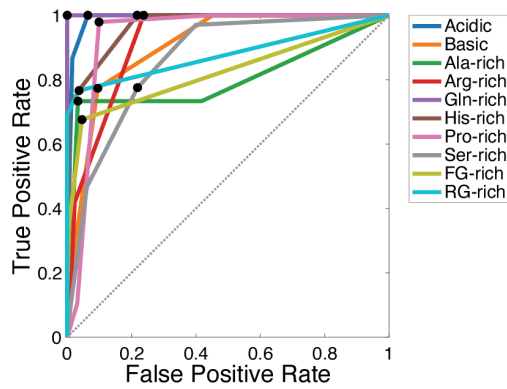

**C**

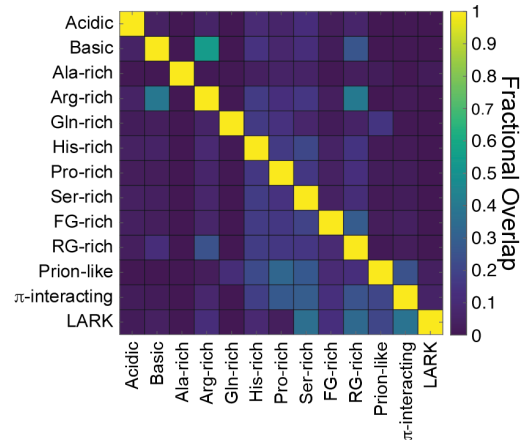

**D**

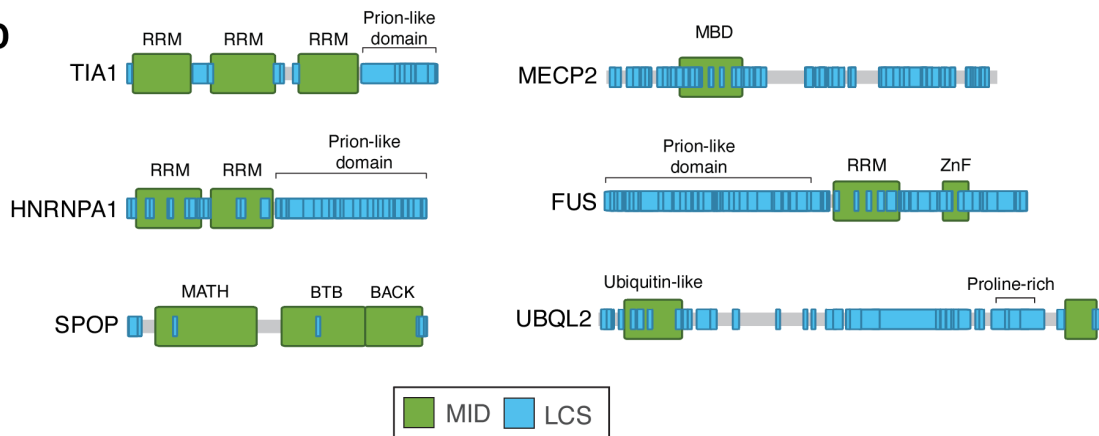

**Figure S1. Mapping condensate-promoting features in condensate-forming proteins. Related to Figure 1.**

- A. Flow chart showing computational steps taken to define putative condensate-forming proteins, condensate-promoting features, pathogenic mutations, and disease annotations. Data sources are shown in parenthesis.
- B. ROC curves for optimizing cutoffs for mapping indicated LCSs across the proteome, benchmarked against a set of validated LCSs (Supplementary Table 2).
- C. Fractional overlap between two types of LCSs across the proteome. The fraction of residues mapped as a particular type of LCS (y-axis) that overlap with another type of LCS (x-axis) is indicated by the color scale.
- D. Examples of known condensate-forming proteins and their condensate-promoting features, as identified by the analytical approach used in this study.

**Figure S2**

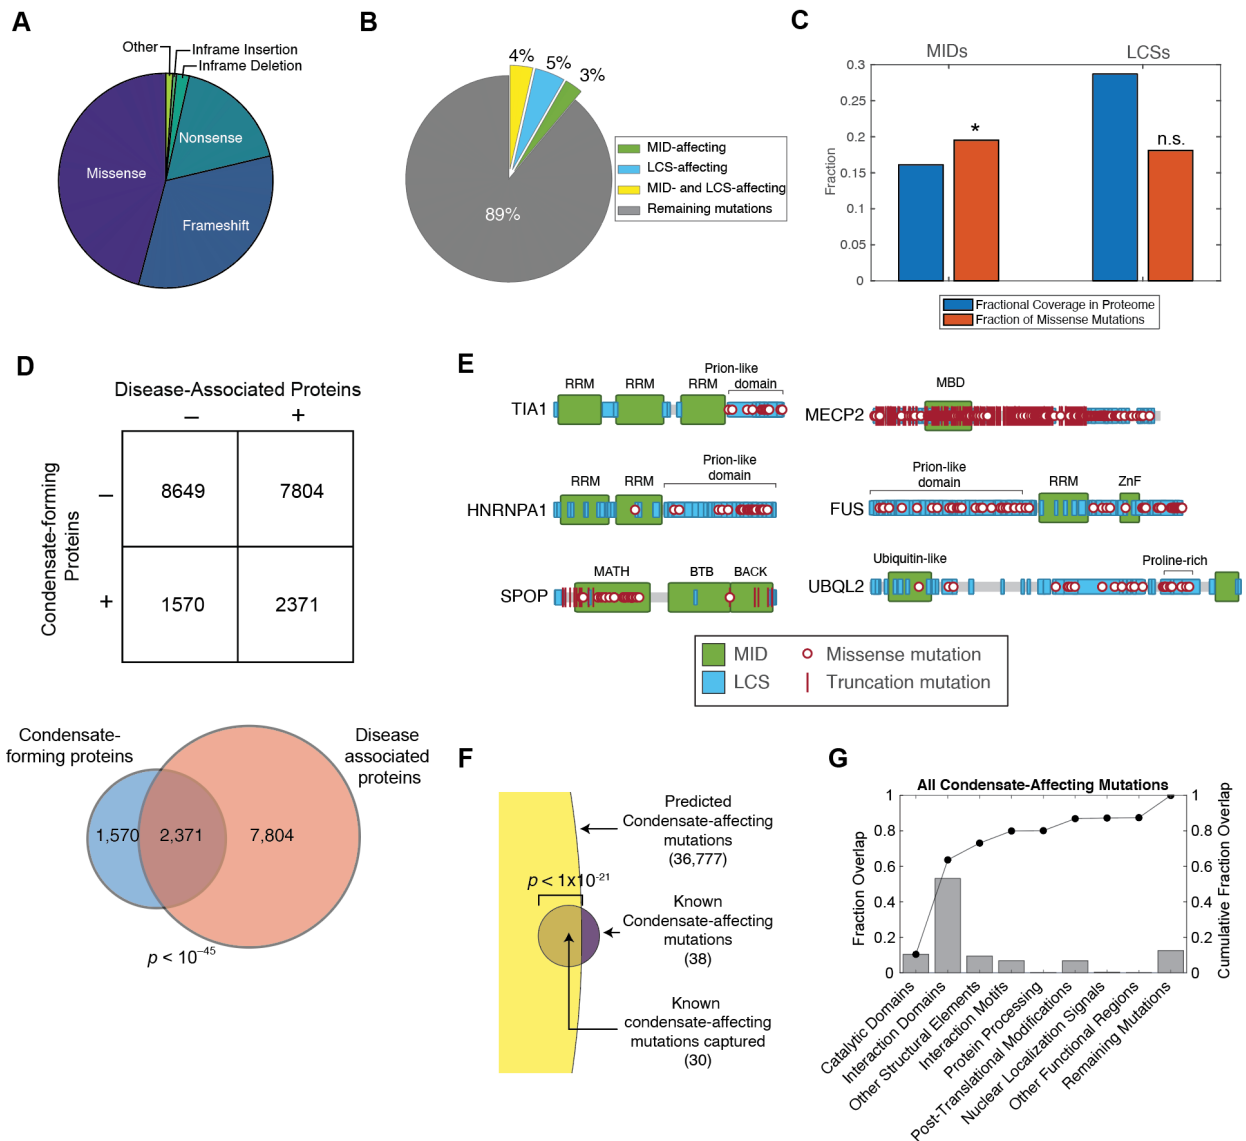

**Figure S2. Mapping mutations to condensate-promoting features. Related to Figure 1.**

- A. Pie chart showing the types of pathogenic mutations examined in the study.
- B. Pie chart showing the proportion of pathogenic mutations that affect MIDs, LCSs, or both MIDs and LCSs within putative condensate-forming proteins.
- C. (Blue) Bar graph of fraction of proteome comprised of MIDs (left) or LCSs (right) along with (red) fraction of all pathogenic missense mutations that occur within MIDs or LCSs. Missense mutations were significantly enriched among MIDs (\*), but not among LCSs (n.s., not significant).  $p$ -value  $< 10^{-250}$  and  $p$ -value  $\sim 1$ , respectively, binomial test.
- D. Venn diagram showing a significant overlap between condensate-forming and proteins with pathogenic mutations ( $p < 10^{-45}$ , Fisher exact test)
- E. Examples of known condensate-forming proteins, their condensate-promoting features, and pathogenic mutations affecting these features as identified by the analytical approach used in this study.
- F. Overlap of predicted condensate-affecting mutations with known condensate-affecting mutations curated from the literature (see also Table S4).
- G. Bar graph of the cumulative proportion of pathogenic condensate-affecting mutations that overlap with canonical molecular-scale models. Moving from left to right, mutations in multiple categories were not double counted. Mutations with no overlap are denoted as “remaining mutations”.

**Figure S3**

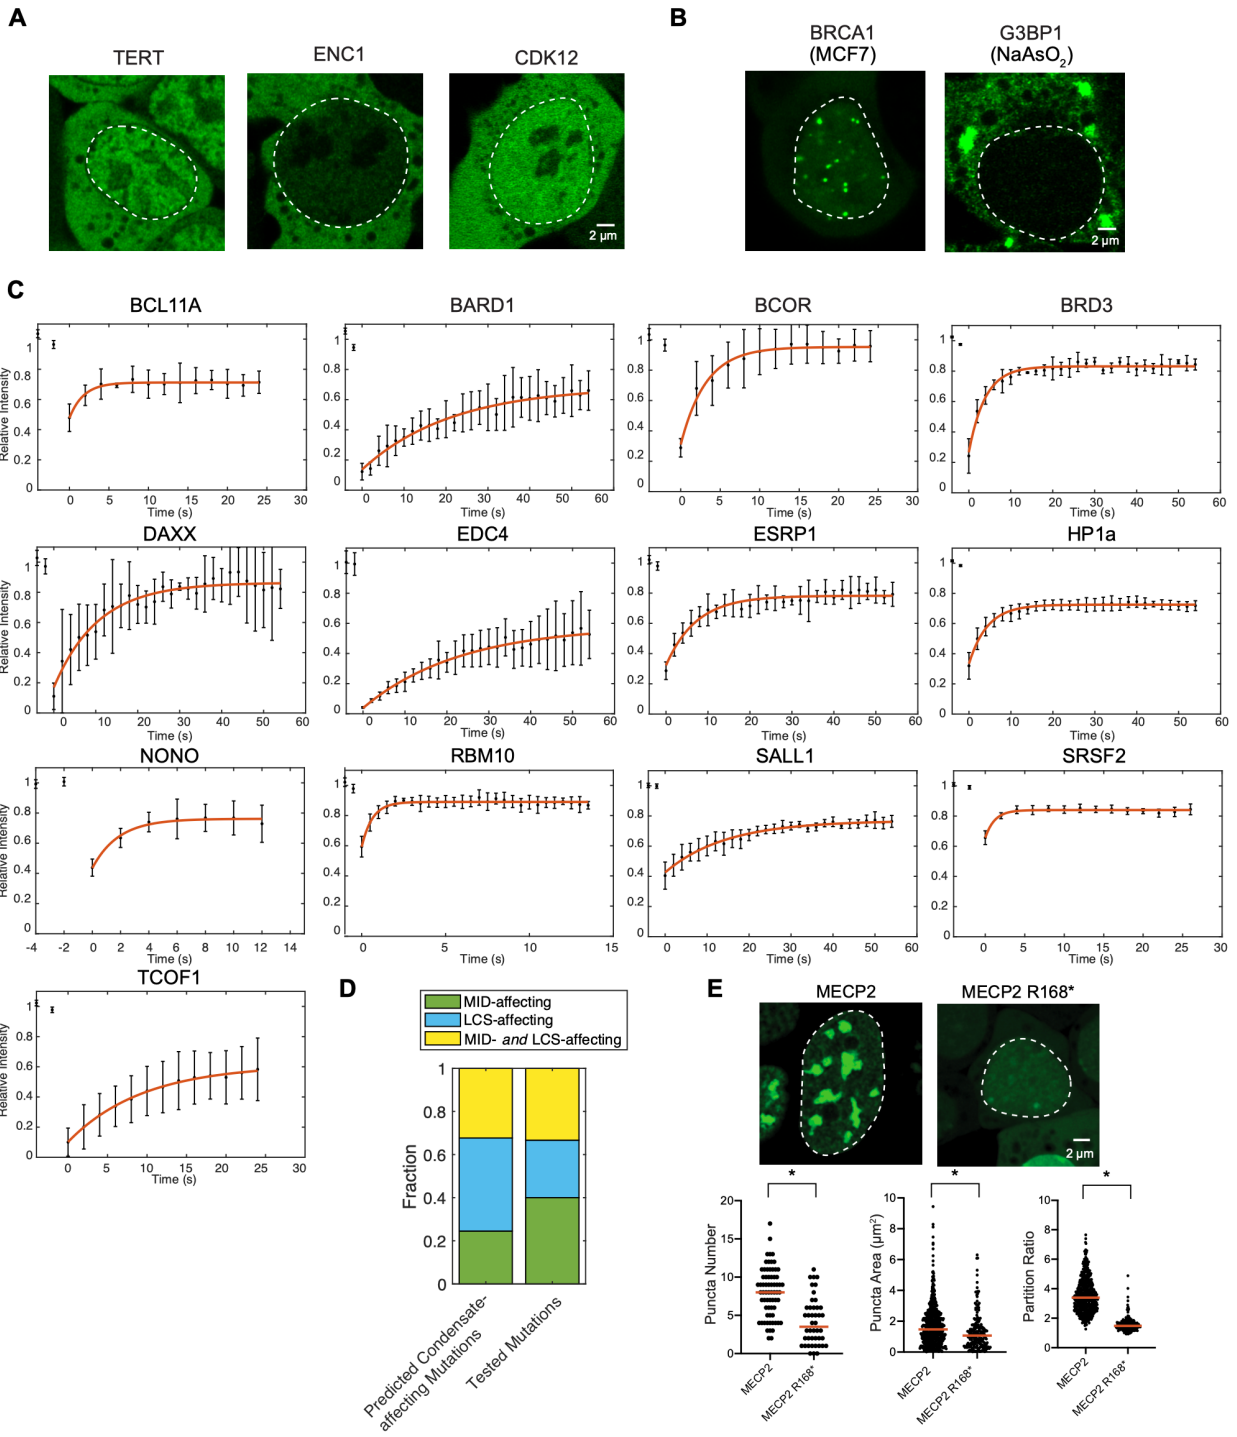

**Figure S3. Pathogenic mutations in condensate-promoting features alter condensate properties in live cells. Related to Figure 3.**

- A. Representative images of 3 of the 12 mEGFP-tagged candidate proteins that did not incorporate into punctate structures indicative of condensates in mESCs. Nuclei indicated with dotted white line. See also Table S5.
- B. Representative images of mGFP-tagged BRCA1 in MCF7 cells (left) and mEGFP-tagged G3BP1 in NaAsO<sub>2</sub> treated mESCs (right), showing incorporation into punctate structures. Both candidates were found to be not punctate in unstressed mESCs. Nuclei are shown with white dotted lines. See also Supplementary Table 5.
- C. Fluorescence recovery after photobleaching (FRAP) of 13 candidate proteins that incorporated into punctate structures in mESCs. Fluorescence intensities normalized to pre-bleach values are plotted over time. Data points represent the mean and error bars represent standard deviation of normalized fluorescent values over  $n = 3-4$  puncta in independent cells that were analyzed for each candidate.
- D. Fraction of predicted condensate-affecting mutations (left) or those selected for experimental evaluation (right) that were MID-affecting, LCS-affecting, or MID- and LCS-affecting.
- E. Representative images (top) and quantification of puncta number (bottom, left), puncta area (bottom, middle), and partition ratio (bottom, right) for mEGFP-tagged MECP2 and mEGFP-tagged MECP2 R168\* mutant in mESCs.

**Figure S4**

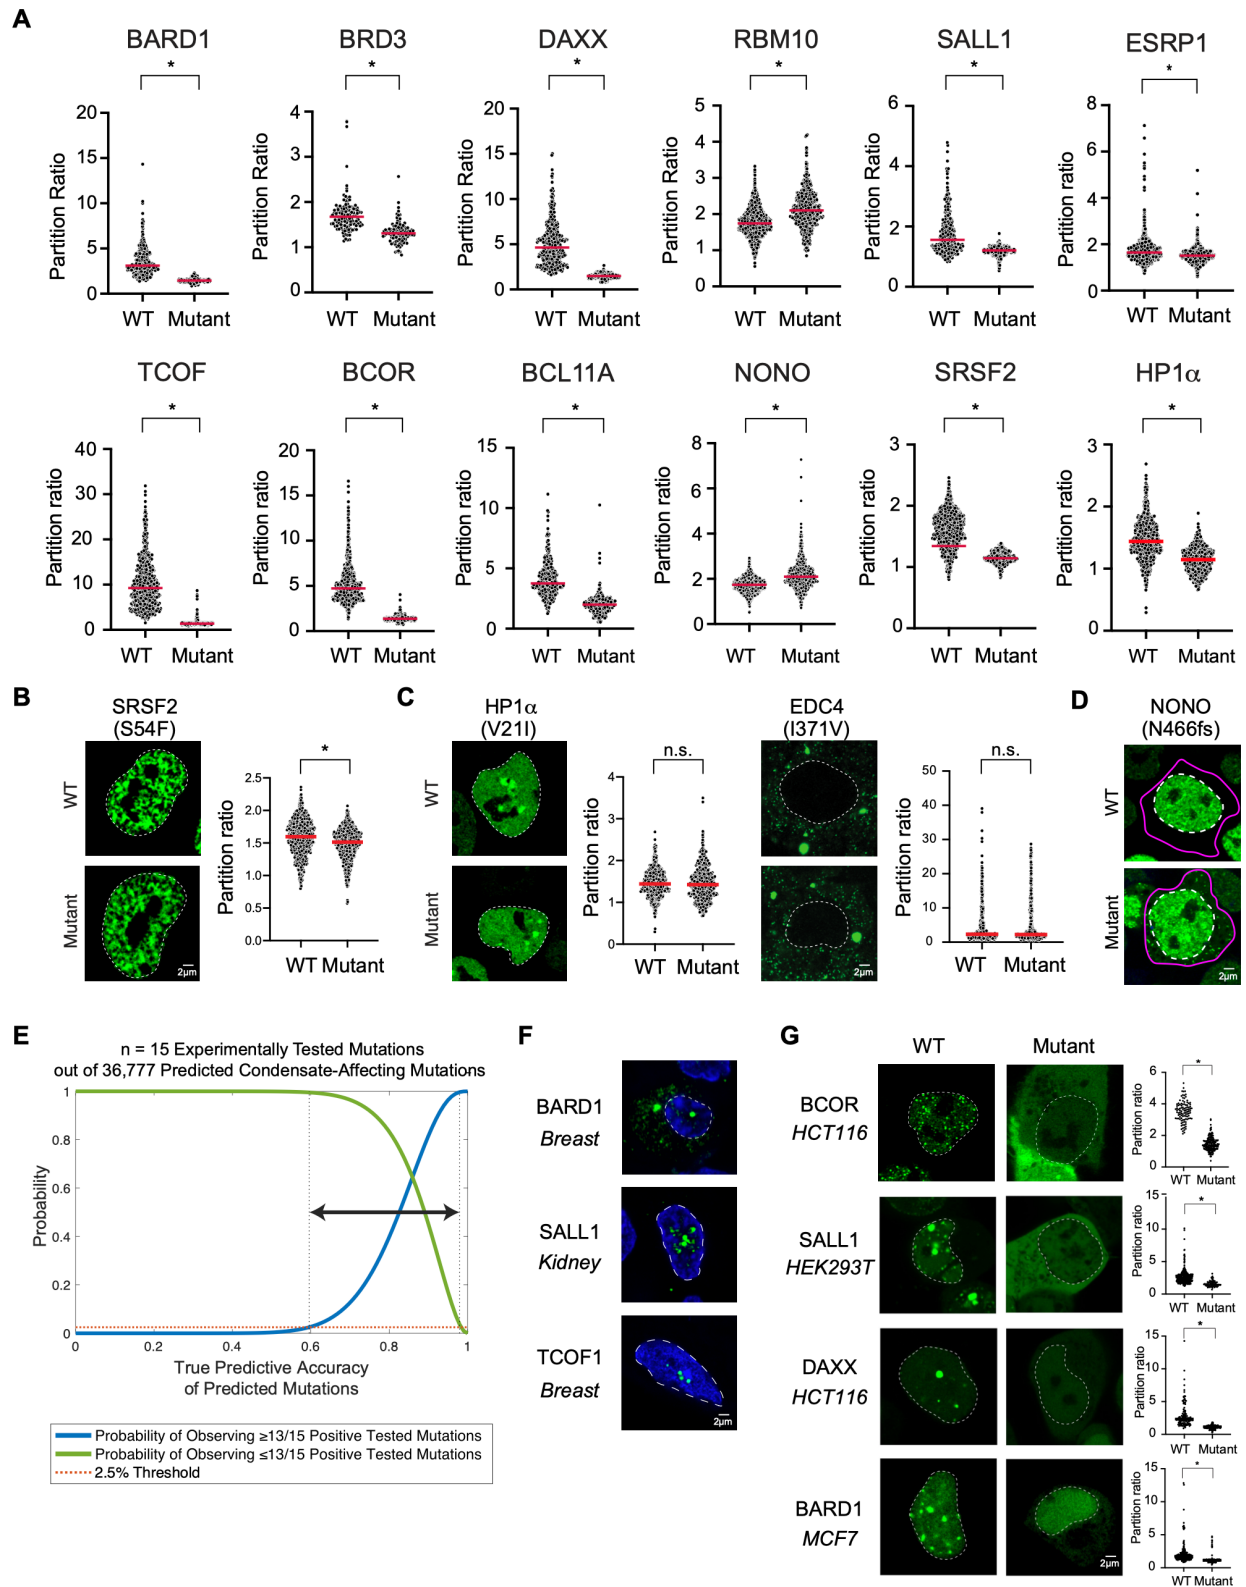

**Figure S4. Mutations in condensate-promoting features cause diverse condensate dysregulation phenotypes. Related to Figure 3.**

- A. Quantification of partition ratios of wild-type and mutant mEGFP-tagged cell lines for indicated candidates. \*,  $p$ -values < 0.0001. See also Table S6.
- B. Representative images (left) and quantification (right) for a second SRSF2 mutant tested in mEGFP-tagged mESC lines, showing a mild but significant effect on partitioning. \*,  $p$ -value < 0.0001.
- C. Representative images and quantification for a second HP1a mutant (left) and a WT/mutant pair for EDC4 (right) showing no significant difference in partitioning between the WT versus the mutant protein.
- D. Representative images of mESC lines expressing WT or mutant NONO, reproduced from Fig. 3c, showing the cytoplasmic boundary of the cell of interest (magenta). Nuclear outline is shown as a white dashed line.
- E. Estimation of the 95% confidence interval of the accuracy of the predicted catalog of condensate-affecting mutations. Under the assumption of randomly selected mutations, the probability of observing  $\geq 13/15$  (blue) or  $\leq 13/15$  (green) positive experimental outcomes from a catalog of  $n = 36,777$  mutations as a function of all possible true catalog accuracies. Probabilities are computed using a hypergeometric distribution with the assumption of random sampling. Red dashed line indicates probability of 2.5% and its intersections with the red and blue curves denote an estimate for the 95% confidence interval for the true catalog accuracy to be between 60-98%.
- F. Representative images of BARD1, SALL1, and TCOF1 immunofluorescence in human breast, kidney, and breast tissue, respectively. Nuclear outline is shown as a white dashed line.
- G. Representative images of disease-relevant human cell lines expressing WT or mutant BCOR, SALL1, DAXX, and BARD1 (left) with quantification of partition ratios of wild-type and mutant cell lines for indicated candidates (right). \*,  $p$ -values < 0.0001. Specific cell lines are shown adjacent to the image. Nuclear outline is shown as a white dashed line.



**Table S1. LCSs used in this study and optimization of LCS mapping against a set of benchmark proteins. Related to Figure 1.**

| LCS                     | Amino acids | Test Protein | Curated coordinates                                                                                                    | Refs.                                                            | Mapped coordinates                                                                              | AUC  | Optimal Frequency in 5-amino acid Window | TPR  | FPR                |
|-------------------------|-------------|--------------|------------------------------------------------------------------------------------------------------------------------|------------------------------------------------------------------|-------------------------------------------------------------------------------------------------|------|------------------------------------------|------|--------------------|
| Acidic patch            | Asp, Glu    | NPM1         | 34-39, 120-130, 161-188                                                                                                | (Mitrea et al., 2016)                                            | 118-134,159-189                                                                                 | 0.99 | 0.5                                      | 1.0  | 0.06               |
| Basic patch             | Arg, Lys    | MECP2        | 170-181, 184-194, 246-258, 263-274, 282-289, 301-310, 340-348                                                          | (Li et al., 2020)                                                | 26-39,105-115, 167-178, 249-258, 264-272,302-310                                                | 0.91 | 0.5                                      | 0.77 | 0.09               |
| Alanine-rich region     | Ala         | HXD13        | 57-71                                                                                                                  | (Basu et al., 2020)                                              | 18-39,46-75,92-126                                                                              | 0.80 | 1.0                                      | 0.73 | 0.03               |
| Arginine-rich region    | Arg         | SURF6        | 29-31, 56-58, 81-82, 118-120, 145-148, 152-159, 216-217, 221-223, 234-237, 246-249, 299-306, 321-326, 330-331, 336-345 | (Mitrea et al., 2016, 2018)                                      | 142-163, 213-225, 233-250, 295-310, 320-349                                                     | 0.92 | 0.3                                      | 1.0  | 0.24               |
| Glutamine-rich region   | Gln         | HTT          | 17-40                                                                                                                  | (Pesket et al., 2018)                                            | 15-41, 49-68, 498-506, 593-601                                                                  | 1.00 | 0.5                                      | 1.0  | 3x10 <sup>-4</sup> |
| Histidine-rich region   | His         | DYR1A        | 590-616                                                                                                                | (Lu et al., 2018)                                                | 531-541, 596-622, 648-656                                                                       | 0.97 | 0.1                                      | 1.0  | 0.22               |
| Proline-rich region     | Pro         | UBQL2        | 491-538                                                                                                                | (Dao et al., 2018)                                               | 7-17, 313-327, 470-478, 490-537, 575-580                                                        | 0.94 | 0.3                                      | 0.98 | 0.10               |
| Serine-rich region      | Ser         | MED1         | 1078-1482                                                                                                              | (Sabari et al., 2018)                                            | 808-816, 1021-1029, 1077-1150, 1163-1171, 1223-1285, 1366-1375, 1463-1471, 1532-1543            | 0.86 | 0.3                                      | 0.78 | 0.22               |
| FG-rich region          | Gly, Phe    | NUP98        | 1-469                                                                                                                  | (Schmidt and Görlich, 2015)                                      | 3-68, 75-102, 113-153, 224-278, 286-306, 315-395, 405-424, 433-453, 461-483, 871-884, 1052-1060 | 0.83 | 0.3                                      | 0.69 | 0.05               |
| RG-rich region          | Arg, Gly    | FUS          | 211-285, 371-422, 453-526                                                                                              | (Wang et al., 2018)                                              | 211-222, 230-270, 375-411, 469-507                                                              | 0.88 | 0.3                                      | 0.77 | 0.04               |
| Prion-like domain       | -           | -            | -                                                                                                                      | (Lancaster et al., 2014; Martin et al., 2020; Wang et al., 2018) | -                                                                                               | -    | -                                        | -    | -                  |
| pi-interacting residues | -           | -            | -                                                                                                                      | (Vernon et al., 2018)                                            | -                                                                                               | -    | -                                        | -    | -                  |
| LARKS                   | -           | -            | -                                                                                                                      | (Hughes et al., 2018)                                            | -                                                                                               | -    | -                                        | -    | -                  |

List of LCSs within IDRs associated with condensate formation used in this study. Preexisting approaches were used when available to map certain LCSs across the proteome (prion-like domains, pi-interacting residues, and LARKS). The remainder of LCSs were mapped using a statistical approach (Methods) benchmarked against protein regions corresponding to previously characterized LCSs in test proteins identified in prior studies. These curated LCSs were used as 'gold standards' for benchmarking our LCS mapping parameter of frequency of corresponding amino acid types within 5-amino acid windows (see Methods). The optimal cutoff and its performance are indicated. AUC, area under the curve from ROC curves (Figure S1B). FG, phenylalanine-glycine; RG, arginine-glycine; LARKS, low-complexity, aromatic-rich kinked segments; AUC, area under the curve; TPR, true positive rate; FPR, false positive rate; Refs., references.

**Table S2. Pathological mutations known to affect condensates. Related to Figure 3.**

| Protein            | Diseases                                                        | Mutations                                                                                     | References                                         | Notes for uncaptured mutations                                                                         |
|--------------------|-----------------------------------------------------------------|-----------------------------------------------------------------------------------------------|----------------------------------------------------|--------------------------------------------------------------------------------------------------------|
| ANXA11             | Amyotrophic lateral sclerosis                                   | <b>Asp40Gly, Gly38Arg, His390Pro, Arg456His</b>                                               | (Nahm et al., 2020)                                |                                                                                                        |
| $\alpha$ SYNUCLEIN | Parkinson's disease                                             | Ser129Glu, Ala53Thr, Glu46Lys                                                                 | (Ray et al., 2020)                                 | Mutation not in variant databases sourced in this study; Mutation does not affect defined MIDs or LCSs |
| DDX3X              | Medulloblastoma, Intellectual disability                        | Ala222Pro, <b>Thr275Met</b> , Gly302Val, Leu353Phe, Met370Arg, Leu351Trp, Leu556Ser           | (Fonseca et al., 2021; Valentin-Vega et al., 2016) | Mutation not in variant databases sourced in this study; Mutation does not affect defined MIDs or LCSs |
| FUS                | Amyotrophic lateral sclerosis and frontotemporal lobar dementia | <b>Gly399Val, Gly187Ser, Gly156Glu</b>                                                        | (Burke et al., 2015; Patel et al., 2015)           |                                                                                                        |
| HNRNPA1            | Amyotrophic lateral sclerosis                                   | <b>*Asp314Val</b>                                                                             | (Molliex et al., 2015)                             |                                                                                                        |
| HNRNPDL            | Limb-girdle muscular dystrophy 1G                               | <b>Asp378His, Asp378Asn</b>                                                                   | (Battle et al., 2020)                              |                                                                                                        |
| KEAP1              | Lung squamous cell carcinoma                                    | Arg320Glu, <b>Arg470Cys</b>                                                                   | (Cloer et al., 2018)                               | Mutation not in variant databases sourced in this study                                                |
| MECP2              | Rett syndrome                                                   | <b>Arg168Ter, Arg255Ter, Arg270Ter, Arg294Ter, Pro389Ter, Arg306Cys, Pro322Leu, Pro225Arg</b> | (Li et al., 2020)                                  | Mutation does not affect defined MIDs or LCSs                                                          |
| MLL4               | Kabuki Syndrome                                                 | Gln4092Ter                                                                                    | (Fasciani et al., 2020)                            | Mutation not in variant databases sourced in this study                                                |
| NF2                | Cancers                                                         | Leu46Arg, Leu64Pro, Leu141Pro                                                                 | (Meng et al., 2021)                                | Protein not captured in set of defined condensate-forming proteins                                     |
| RBM20              | Congenital dilated cardiomyopathy                               | <b>Arg636Ser</b>                                                                              | (Schneider et al., 2020)                           |                                                                                                        |
| SHP2               | Noonan syndrome                                                 | <b>Glu76Lys, Arg498Leu, Gln506Pro, Gly464Ala, Tyr279Cys, Tyr468Met</b>                        | (Zhu et al., 2020)                                 | Mutation not in variant databases sourced in this study; Mutation does not affect defined MIDs or LCSs |
| SPOP               | Prostate cancer                                                 | <b>Phe133Val, Trp131Gly</b>                                                                   | (Bouchard et al., 2018)                            |                                                                                                        |
| TDP43              | Amyotrophic lateral sclerosis                                   | <b>Ala321Gly, Ala321Val, Glu331Lys, Met337Val, Ala326Pro, Met337Pro</b>                       | (Conicella et al., 2016)                           | Mutation not in variant databases sourced in this study;                                               |
| TIA1               | Amyotrophic lateral sclerosis and frontotemporal dementia       | <b>Pro362Leu, Ala381Thr, Glu384Lys</b>                                                        | (Mackenzie et al., 2017)                           |                                                                                                        |
| TAU                | Alzheimer's disease                                             | Pro301Leu                                                                                     | (Kanaan et al., 2020)                              | Mutations not in variant databases sourced in this study                                               |
| UBQL2              | Amyotrophic lateral sclerosis                                   | <b>Pro506Ser, Pro506Thr, Pro506Ala, Thr487Ile, Pro497Leu, Pro497His, Pro497Ser</b>            | (Dao et al., 2019; Sharkey et al., 2018)           | Mutation does not affect defined MIDs or LCSs                                                          |

Known pathological mutations that affect condensates curated from the literature. **Bolded** mutations, were captured among the set of mutations predicted to affect condensates in the catalog. Reasons for why certain mutations were not captured in our catalog are

mentioned in the right-most column. \*, this HNRNPA1 mutation is described in the corresponding study as Asp262Val, affecting a non-canonical isoform and maps to position 314 in the canonical isoform used in our analyses. See also Figure S2D.

**Table S3. Selected protein candidates and mutations used in experimental tests. Related to Figure 3.**

| Protein      | cDNA source        | Disease(s)                                       | Distribution in mESCs | Selected Mutation(s) | Mutation effect                                                    |
|--------------|--------------------|--------------------------------------------------|-----------------------|----------------------|--------------------------------------------------------------------|
| MECP2        | (Li et al., 2020)  | Rett syndrome                                    | Punctate              | Arg186Ter            | Reduced condensate incorporation                                   |
| BARD1        | MHS6278-211689242  | Breast, ovarian, prostate, Pancreatic cancers    | Punctate              | Arg406Ter            | Reduced condensate incorporation                                   |
| BCL11A       | Addgene 139809     | Intellectual development disorders               | Punctate              | Gln177Ter            | Reduced condensate incorporation                                   |
| BCOR         | MHS6278-202757783  | Various cancers                                  | Punctate              | Tyr657Ter            | Reduced condensate incorporation                                   |
| BRD3         | Unpublished        | Intellectual disability                          | Punctate              | Phe334Ser            | Reduced condensate incorporation                                   |
| HP1 $\alpha$ | (Li et al., 2020)  | Developmental disorder, Autism                   | Punctate              | Val21Ile, Trp142Cys  | Reduced condensate incorporation                                   |
| DAXX         | Addgene 52023      | Various cancers                                  | Punctate              | Arg318Ter            | Reduced condensate incorporation                                   |
| EDC4         | Addgene 66597      | Congenital heart disease                         | Punctate              | Ile371Val            | Reduced condensate incorporation                                   |
| ESRP1        | MHS6278-202833454  | Deafness, Ear malformation                       | Punctate              | Leu259Val            | Reduced condensate incorporation                                   |
| NONO         | Addgene 127655     | Developmental delay                              | Punctate              | Asn466fs             | Enhanced condensate incorporation; Altered condensate localization |
| RBM10        | Addgene 81958      | Lung, bladder, colon, pancreatic cancers         | Punctate              | Val354Met            | Enhanced condensate incorporation                                  |
| SALL1        | MMM1013-202859719  | Townes-Brocks syndrome                           | Punctate              | Ser372Ter            | Reduced condensate incorporation                                   |
| SRSF2        | (Guo et al., 2019) | Acute myeloid leukemia, Myelodysplastic syndrome | Punctate              | Ser54Phe, Pro95His   | Reduced condensate incorporation                                   |
| TCOF         | MHS1010-202695722  | Treacher-Collins syndrome                        | Punctate              | Gln55Ter             | Reduced condensate incorporation                                   |
| ASXL1        | MHS6278-213245938  | Acute myeloid leukemia, Myelodysplastic syndrome | Not punctate          | -                    | -                                                                  |
| BCL6         | Addgene 81869      | Various cancers                                  | Not punctate          | -                    | -                                                                  |
| BRCA1        | Addgene 14999      | Breast, ovarian cancers                          | Not punctate          | -                    | -                                                                  |
| DVL2         | Addgene 24802      | Neural tube defects                              | Not punctate          | -                    | -                                                                  |
| DYR1A        | Addgene 101770     | Autism, Intellectual disability                  | Not punctate          | -                    | -                                                                  |
| ENC1         | MHS6278-202826591  | Autism                                           | Not punctate          | -                    | -                                                                  |
| G3BP1        | Addgene 127104     | Autism                                           | Not punctate          | -                    | -                                                                  |
| HMGA2        | Addgene 52727      | Silver-Russel syndrome                           | Not punctate          | -                    | -                                                                  |
| NIPBL        | Addgene 107716     | Cornelia-deLange syndrome                        | Not punctate          | -                    | -                                                                  |
| NKX21        | Addgene 119173     | Choreoathetosis                                  | Not punctate          | -                    | -                                                                  |
| SNCAP        | MHS6278-202809062  | Parkinson disease                                | Not punctate          | -                    | -                                                                  |
| TERT         | Addgene 114315     | Dyskeratosis congenita                           | Not punctate          | -                    | -                                                                  |

25 protein candidates from catalog selected for experimental study, not including MECP2, which was used as a positive control (Li et al., 2020). cDNA source indicates Addgene catalog number, cDNA clone ID (Team et al., 2009), or a prior study. mESCs, mouse

embryonic stem cells. See also Supplemental Discussion, *Selection of Candidates and Mutations for Experimental Validation*.
